# Supplementary material for: Columbianadin Suppresses Lipopolysaccharide (LPS)-Induced Inflammation and Apoptosis through the NOD1 Pathway
Source: MDPI journal article supplement (doi:10.3390/molecules24030549), 2019-02-02
Supplement: s1 [file s1]

**Table S1.** The following primers were used.

|                  |                               |
|------------------|-------------------------------|
| homo-NOD1-F1     | 5'-CACTCAGAGCAAAGTCGTGG-3'    |
| homo-NOD1-R1     | 5'-CAGCACGAACTTGGAGTCAC-3'    |
| homo-RIP2-F1     | 5'-GTCCCTCTCACAGTCACGAA-3'    |
| homo-RIP2-R1     | 5'-TGCTTGATACTGGCCCTTGA-3'    |
| homo-NFkB-P65-F1 | 5'-GTGAACCGAAACTCTGGCAG-3'    |
| homo-NFkB-P65-R1 | 5'-ATCAGCTTGCGAAAAGGAGC-3'    |
| homo-GAPDH-F1    | 5'-CATGAGAAGTATGACAACAGCCT-3' |
| homo-GAPDH-R1    | 5'-AGTCCTTCCACGATACCAAAGT-3'  |
